# Supplementary material for: Evolutionary Conservation of Expression Profiles Between Human and Mouse Orthologous Genes
Source: Oxford University Press journal article supplement (doi:10.1093/molbev/msj054), 2005-11-09
Supplement: msj054_Supplementary_Data.zip [file msj054_Supplementary_Data.zip]

Archive with 3 entries (3 files):
- msj054supp2.pdf
- msj054supp3.pdf
- msj054supp1.pdf
