# Supplementary figures and images for: Evolutionary Conservation of Expression Profiles Between Human and Mouse Orthologous Genes
Source: Oxford University Press journal article supplement (doi:10.1093/molbev/msj054), 2005-11-09

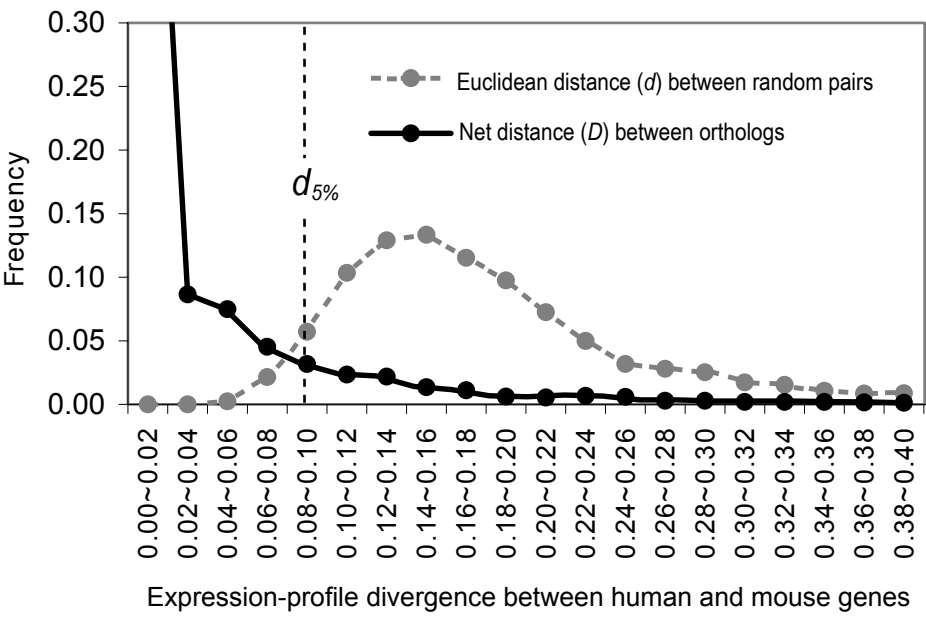

Figure S2.

Supplement: msj054_Supplementary_Data.zip [file msj054_Supplementary_Data.zip]

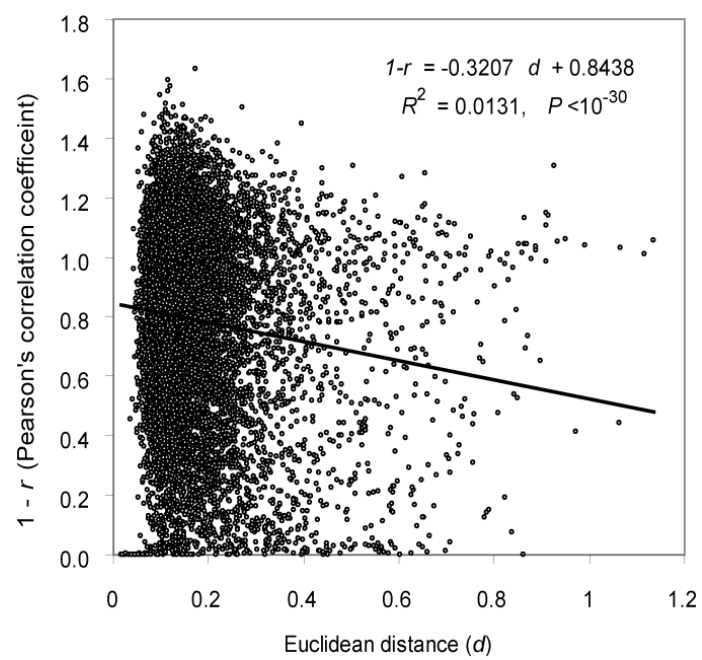

**Figure S3.**

Supplement: msj054_Supplementary_Data.zip [file msj054_Supplementary_Data.zip › msj054supp3.pdf]

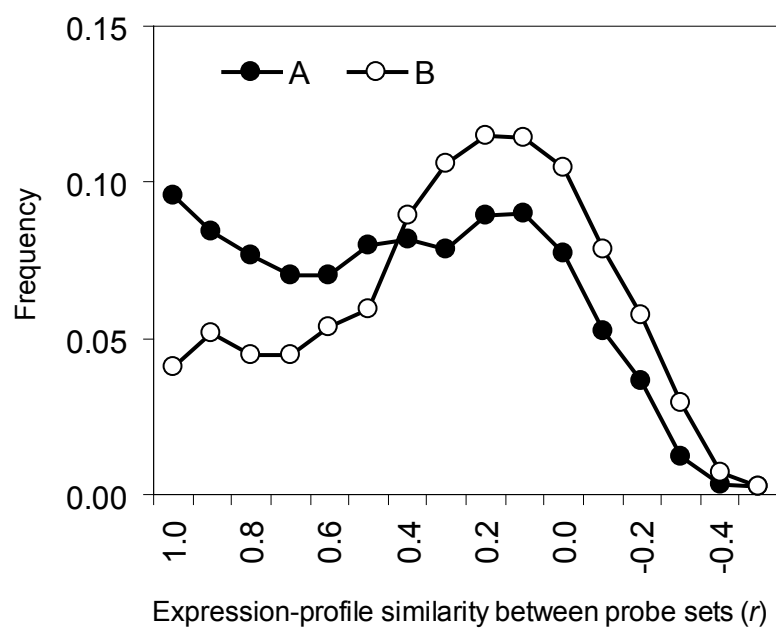

**Figure S1.**

Supplement: msj054_Supplementary_Data.zip [file msj054_Supplementary_Data.zip › msj054supp1.pdf]
